# Supplementary material
Source: bioRxiv or medRxiv preprint supplement (https://medrxiv.org/highwire/filestream/84663/field_highwire_adjunct_files/0/2020.06.04.20122879-1.pdf)
Supplement: Supplementary file [file 2020.06.04.20122879-1.pdf]

**Supplementary information**

**for**

**CoVID-19 in Singapore: Impact of Contact Tracing and Self-awareness  
on Healthcare Demand**

## 1, Details of distribution models used in our parameter estimation.

For the serial interval and the different types of delay (e.g., tracing delay, onset to isolation delay for 4 different classes, and isolation to confirmation delay in all cases), we tested their best-fit results with different distributions as list in Table 1.

**Table 1.** Distribution function.

| Distribution          | Function                                                                     | Notes                                                                                |
|-----------------------|------------------------------------------------------------------------------|--------------------------------------------------------------------------------------|
| Normal                | $f(x) = \frac{\exp(-x^2/2)}{\sqrt{2\pi}}$                                    | $x$ is real number.                                                                  |
| Skewed norm           | $f(x, a) = 2 \cdot \text{norm. pdf}(x) \cdot \text{norm. cdf}(ax)$           | <i>pdf</i> and <i>cdf</i> represent probability density and cumulative distribution. |
| Lognormal             | $f(x, s) = \frac{1}{sx\sqrt{2\pi}} \exp\left(-\frac{\log^2(x)}{2s^2}\right)$ | $x > 0, s > 0$ .                                                                     |
| Weibull               | $f(x, c) = cx^{c-1} \exp(-x^c)$                                              | $x \geq 0, c > 0$ .                                                                  |
| Exponentiated Weibull | $f(x, a, c) = ac[1 - \exp(-x^c)]^{a-1} \exp(-x^c)x^{c-1}$                    | $x > 0, a > 0, c > 0$                                                                |
| Fold Cauchy           | $f(x, c) = \frac{1}{\pi(1 + (x - c)^2)} + \frac{1}{\pi(1 + (x + c)^2)}$      | $x \geq 0$ .                                                                         |
| Gamma                 | $f(x, a) = \frac{x^{a-1} \exp(-x)}{\Gamma(a)}$                               | $x \geq 0, a > 0$ . Here $\Gamma(a)$ refers to the gamma function.                   |
| Logistic              | $f(x, A1, A2, p, x0) = A2 + \frac{(A1 - A2)}{1 + (x/x0)^p}$                  |                                                                                      |

\* The probability density above is defined in the “standardized” form. To shift and/or scale the distribution use the loc and scale parameters. Specifically,  $f(x, loc, scale)$  is identically equivalent to  $f(y) / scale$  with  $y = (x - loc)/scale$ .

## 2, Serial interval estimation.

We counted the delay between the symptom-onset time of infector and infectee of 72 pairs of linked cases, then tested the best-fit result with different distributions as list in Table 1. It can be observed that both of the skewed normal distribution, exponentiated Weibull distribution, lognormal distribution and gamma distribution have quit a good fit for serial interval, but the skewed normal distribution provided the best fit.

**Table 2.** The parameters and MSE of the top four best fit distributions for serial interval based on 72 pairs reported linked transmission events in Singapore between January 23, 2020 and March 16, 2020.

|                 | Distribution          | Parameters                                         | MSE            |
|-----------------|-----------------------|----------------------------------------------------|----------------|
| Serial interval | Skewed normal         | $a=1.1122, loc=-0.3588, scale=5.8032$              | <b>0.00092</b> |
|                 | Exponentiated Weibull | $a=11.0015, c=6.5081, loc=-71.8939, scale=64.5313$ | 0.00093        |
|                 | Lognormal             | $s=0.0427, loc=-105.6226, scale=109.3115$          | 0.00094        |
|                 | Gamma                 | $a=234.9348, loc=-67.9853, scale=0.3055$           | 0.00094        |

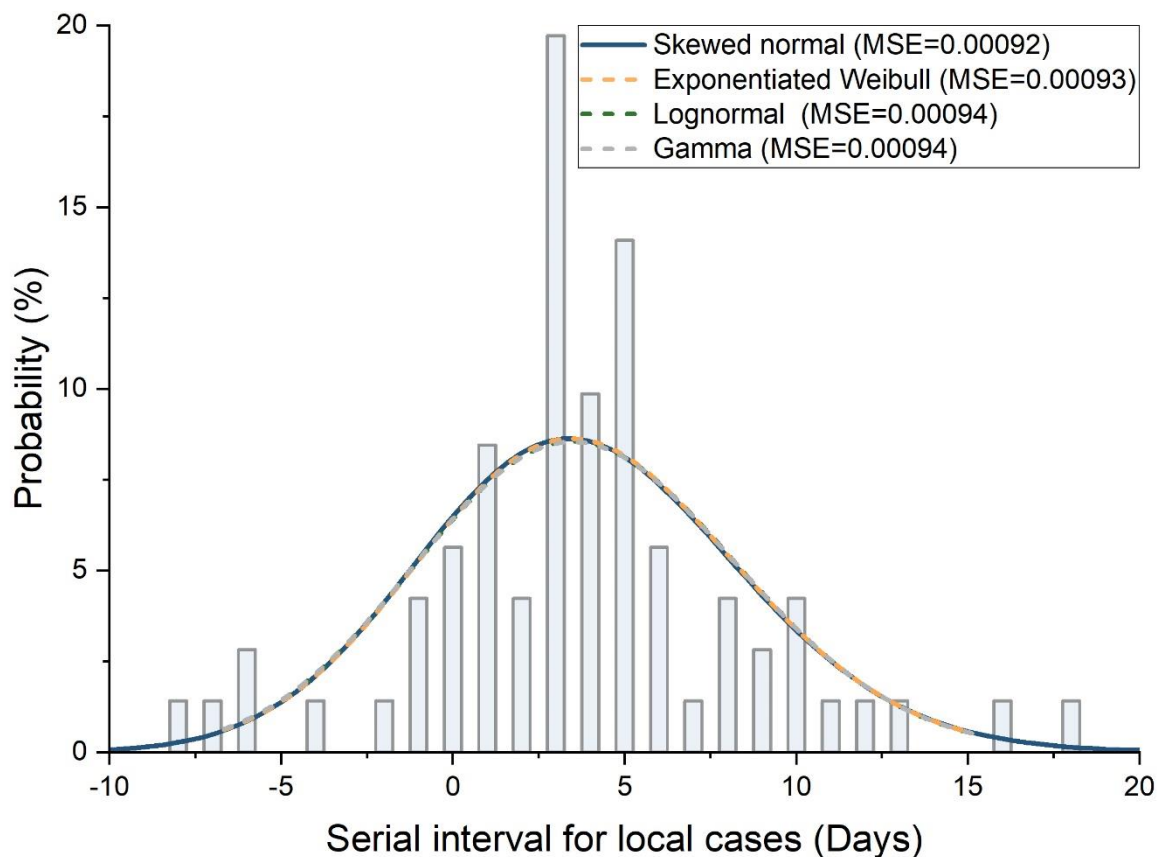

**Figure 1:** Maximum likelihood distributions fit to the serial interval for local cases. To have clear illustrations, only the top four best fit distributions are presented for each case.

### 3, The estimations of different delays.

For each of the different types of delay, we tested their best-fit results with different distributions such as norm, skewed normal, lognormal, Weibull, exponentiated Weibull, fold Cauchy, logistic and gamma distributions (as shown in Table 1). It is found that the logistic distribution provided the best fit for onset to isolation delay for imported cases and tracing delay. The lognormal distribution provided the best fit for isolation to confirmation delay. The skewed normal distribution provided the best fit for the onset to isolation delay for Class 3, while the fold Cauchy and exponentiated Weibull distributions fitted onset to isolation delay for Classes 4 and 5 best, respectively.

**Table 3.** The parameters and MSE of the top 4 best fit distributions for the delay from onset to isolation of imported cases and cases in Classes 3-5 respectively, based on 247 reported transmission events in Singapore between January 23, 2020 and March 16, 2020.

|                | <b>Distribution</b>   | <b>Parameters</b>                               | <b>MSE</b>     |
|----------------|-----------------------|-------------------------------------------------|----------------|
| Imported cases | Logistic              | A1=0.31689, A2=0.0351, x0=1.70214, p=5.35513    | <b>0.00043</b> |
|                | Skewed normal         | a=18855325.0091, loc=0, scale=3.1015            | 0.00398        |
|                | Normal                | loc=1.9859, scale=2.3824                        | 0.00927        |
|                | Fold Cauchy           | c=0.0002, loc=0, scale=0.9999                   | 0.01239        |
| Class 3        | Skewed normal         | a=15958514.6804, loc=0, scale=7.0027            | <b>0.00294</b> |
|                | Fold Cauchy           | c=1.6711, loc=0, scale=2.7604                   | 0.00325        |
|                | Normal                | loc=5.6774, scale=4.0987                        | 0.00333        |
|                | Gamma                 | a=0.9049, loc=0, scale=4.8627                   | 2.31721        |
| Class 4        | Fold Cauchy           | c=1.3474, loc=0, scale=1.7909                   | <b>0.00421</b> |
|                | Lognormal             | s=0.7765, loc=-0.8484, scale=3.7317             | 0.00487        |
|                | Skewed normal         | a=23068404.5626, loc=0, scale=6.0683            | 0.00516        |
|                | Normal                | loc=4.1786, scale=4.4001                        | 0.00602        |
| Class 5        | Exponentiated Weibull | a=145.3763, c=0.4752, loc=-0.8282, scale=0.2194 | <b>0.00069</b> |
|                | Lognormal             | s=0.5792, loc=0.6142, scale=6.0806              | 0.00073        |
|                | Fold Cauchy           | c=2.1146, loc=2.0000, scale=2.0315              | 0.00075        |
|                | Gamma                 | a=2.0148, loc=1.6906, scale=3.0511              | 0.00084        |

**Table 4.** The parameters and MSE of the top four best fit distributions for tracing delay (for cases belonging to Classes 1 and 2) and isolation to confirmation delay, based on 247 reported transmission events in Singapore between January 23, 2020 and March 16, 2020.

|                                 | <b>Distribution</b> | <b>Parameters</b>                              | <b>MSE</b>     |
|---------------------------------|---------------------|------------------------------------------------|----------------|
| Tracing delay                   | Logistic            | A1=0.43346, A2=0.00108, x0=1.17568, p=1.80693  | <b>0.00032</b> |
|                                 | Skewed normal       | a=5818014.6979, loc=0, scale=2.3836            | 0.00462        |
|                                 | Normal              | loc=1.4151, scale=1.9175                       | 0.01179        |
|                                 | Fold Cauchy         | c=0.0003, loc=0, scale=0.5319                  | 0.0736         |
| Isolation to confirmation delay | Lognormal           | s=0.6110, loc=-0.5353, scale=1.6279            | <b>0.00503</b> |
|                                 | Normal              | loc=1.4384, scale=1.4205                       | 0.01573        |
|                                 | Skewed normal       | a=12356208.5594, loc=0, scale=2.0215           | 0.01626        |
|                                 | Logistic            | A1=0.37214, A2=0.01822, x0=1.90346, p=16.17124 | 0.01725        |

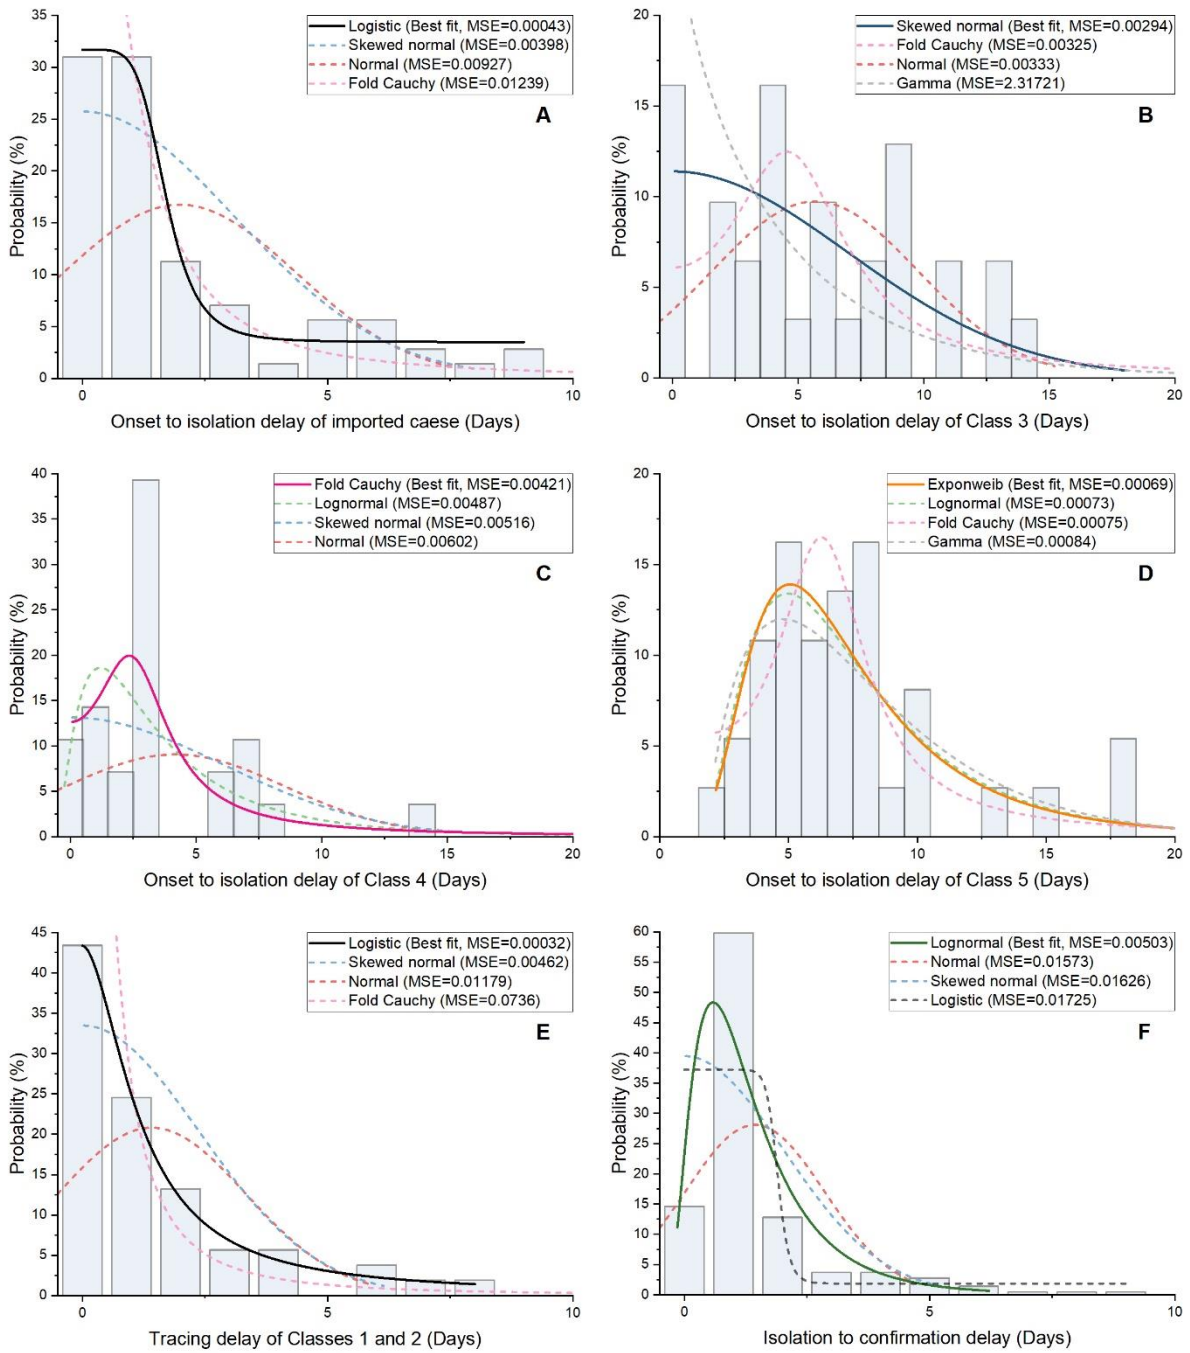

**Figure 2:** Maximum likelihood distributions fit to the delay from onset to isolation for imported cases and cases in Classes 3-5, tracing delay for cases belonging to Classes 1 and 2, and the delay from isolation to confirmation for all cases. To have clear illustrations, only the top four best fit distributions are presented for each case.

#### 4, The basic reproduction number estimation.

We defined two error evaluation metrics to measure the performance of our model:

$$error1 = \frac{1}{N} \sum_{n=1}^N \left( \frac{1}{D} \sum_{d=1}^D |\hat{y}_{n,d} - y_d| \right) \quad (1)$$

$$error2 = \frac{1}{D} \sum_{d=1}^D \left( \left| \frac{1}{N} \sum_{n=1}^N \hat{y}_{n,d} - y_d \right| \right) \quad (2)$$

where  $y_d$  represents the cumulative number of confirmed cases on the d-th day (the first day is January 23), and the  $\hat{y}_{n,d}$  represents the n-th simulation result on the d-th day,  $D$  is the number of days and  $N$  is the number of repetitive simulations.  $error1$  and  $error2$  represent the stability and accuracy of the model, respectively. By varying  $R_0$  from 1.5 to 2.5, we estimated the basic reproduction number for both imported cases and local cases from January 23 to March 16, it can be observed from Figure S3 that when  $R_0 = 2.1$ , the model has the minimum errors,  $error1=33.67$  and  $error2=11.79$ .

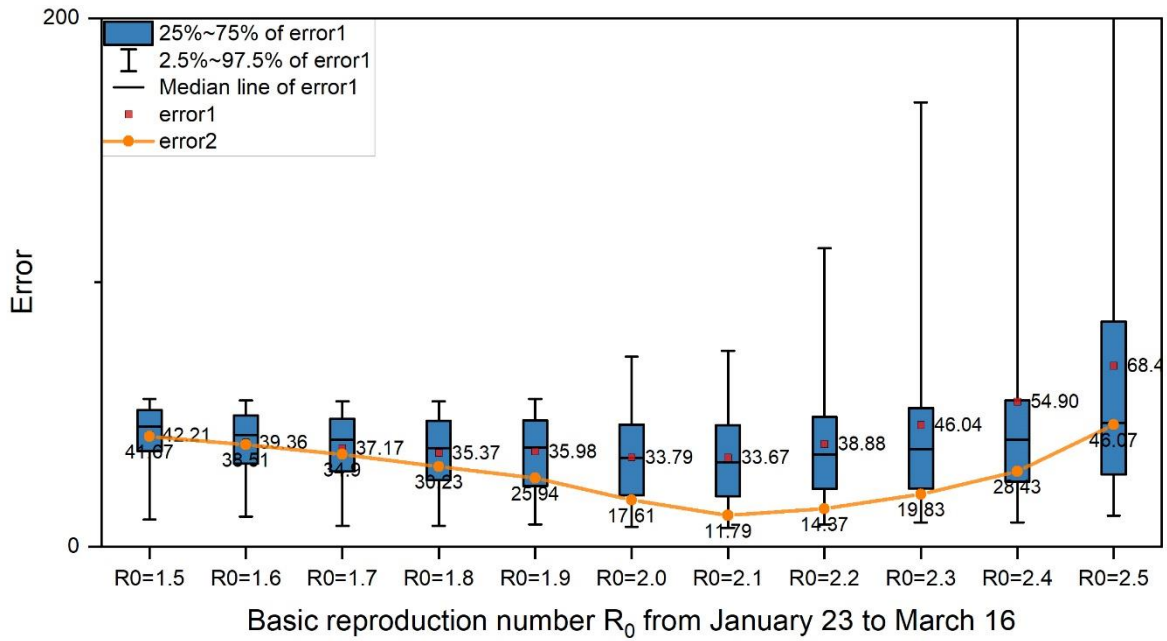

**Figure 3:** The errors of each  $R_0$ . The whiskers and the blue boxes represent 95% and 50% confidence range, respectively. The red dots in the blue box represent  $error1$ , while the orange dots represent  $error2$ .
